# Supplementary material for: Preparation of AuPd/ZnO–CuO for the directional oxidation of glycerol to DHA
Source: Royal Society of Chemistry journal article supplement (doi:10.1039/d0cy00356e), 2020-01-01
Supplement: d0cy00356e1.pdf [file d0cy00356e1.pdf]

# The preparation of AuPd/ZnO-CuO for directional oxidation of glycerol to DHA.

Gengqiang Zhao<sup>a,b,1</sup>, Guandong Wu<sup>a,b,1</sup>, Yanan Liu<sup>a,b</sup>, Yufei He<sup>a,b\*</sup>, Junting Feng<sup>a,b</sup>, Dianqing Li<sup>a,b\*</sup>

<sup>a</sup>State Key Laboratory of Chemical Engineering, Beijing University of Chemical Technology, Beijing 100029, China

<sup>b</sup>Beijing Engineering Center for Hierarchical Catalysts, Beijing University of Chemical Technology, Beijing 100029, China

<sup>1</sup>Gengqiang Zhao and Guandong Wu contributed equally to this work.

\*Corresponding authors at: State Key Laboratory of Chemical Engineering, Beijing University of Chemical Technology, Beijing 100029, China.

E-mail address: yfhe@mail.buct.edu.cn (Y. F. He).

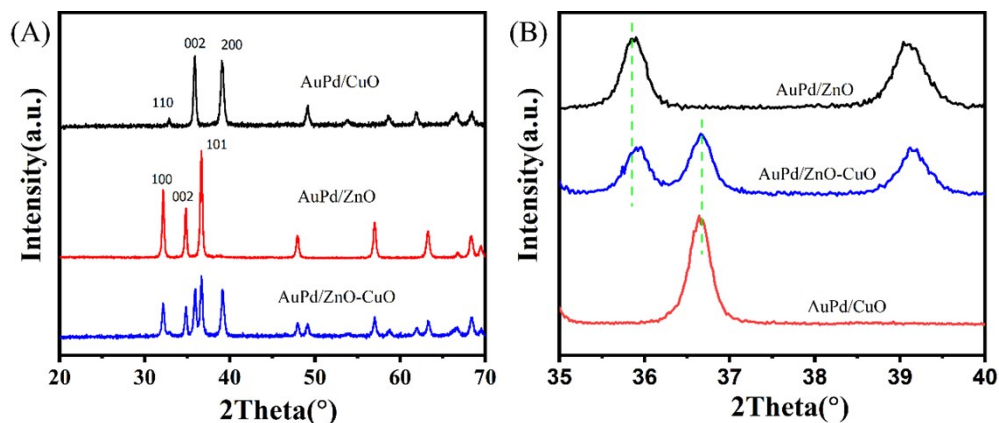

**Figure S1.** Powder XRD patterns of AuPd/CuO, AuPd/ZnO and AuPd/ZnO-CuO supports (A), partially enlarged views (B).

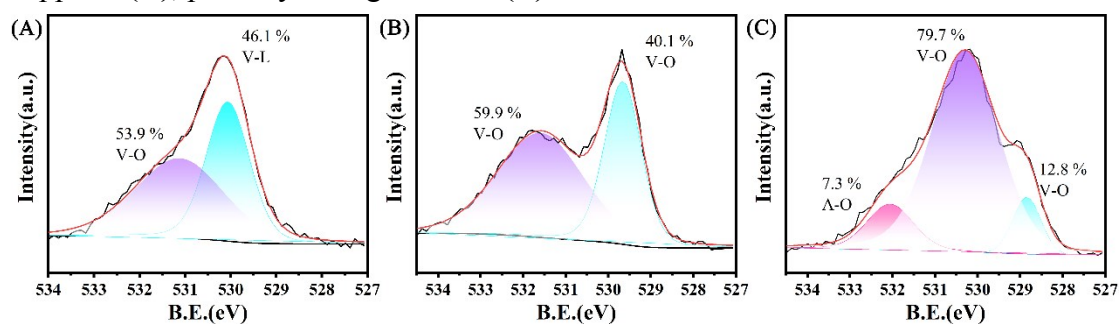

**Figure S2.** The O<sub>1s</sub> XPS spectra of AuPd/Zn<sub>10</sub>Cu<sub>1</sub> (A); AuPd/Zn<sub>1</sub>Cu<sub>10</sub> (B) and AuPd/Zn<sub>1</sub>Cu<sub>1</sub> (C) catalysts.

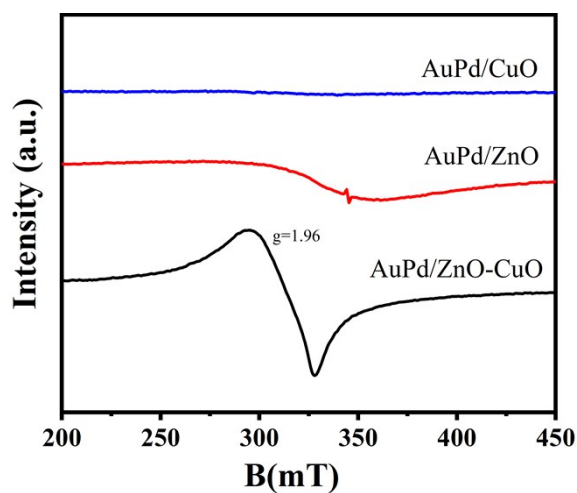

**Figure S3.** EPR spectra of the catalysts.

**Table S1.** XPS analysis of AuPd/ZnO-CuO and Au/ZnO-CuO catalysts.

| <b>Catalysis</b>    | <b>Content (%)</b>    |                         |
|---------------------|-----------------------|-------------------------|
|                     | <b>Au<sup>0</sup></b> | <b>Au<sup>+3+</sup></b> |
| <b>AuPd/ZnO-CuO</b> | 76.4                  | 23.6                    |
| <b>Au/ZnO-CuO</b>   | 86.0                  | 14.0                    |
